# Supplementary material
Source: PubMed Central journal article supplement (PMC3684231)
Supplement: DS_10.1177_0022034513487907.pdf [file DS_10.1177_0022034513487907.pdf]

## RESEARCH REPORTS

### Clinical

M.M. Nascimento<sup>1\*</sup>, Y. Liu<sup>2</sup>, R. Kalra<sup>2</sup>, S. Perry<sup>3</sup>,  
A. Adewumi<sup>4</sup>, X. Xu<sup>5</sup>, R.E. Primosch<sup>4</sup>,  
and R.A. Burne<sup>2</sup>

<sup>1</sup>Department of Restorative Dental Sciences - Division of Operative Dentistry, <sup>2</sup>Department of Oral Biology, <sup>3</sup>Pediatric Dentistry Graduate Program, <sup>4</sup>Department of Pediatric Dentistry, College of Dentistry, and <sup>5</sup>Department of Epidemiology, College of Public Health and Health Professions, University of Florida, Gainesville, FL, USA; \*corresponding author, mnascimento@dental.ufl.edu

*J Dent Res* DOI: 10.1177/0022034513487907

# Oral Arginine Metabolism May Decrease the Risk for Dental Caries in Children

## APPENDIX

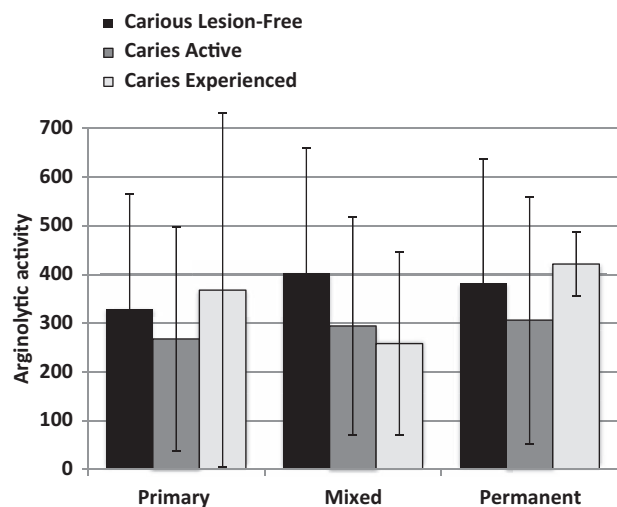

**Appendix Figure.** Mean activity levels of the arginine deiminase system of dental plaque collected from children with different caries status and types of dentition.
